# Supplementary material for: Paths to adaptation under fluctuating nitrogen starvation: The spectrum of adaptive mutations in Saccharomyces cerevisiae is shaped by retrotransposons and microhomology-mediated recombination
Source: PubMed Central journal article supplement (PMC10218751; doi:10.1371/journal.pgen.1010747), 2023-05-16

A.

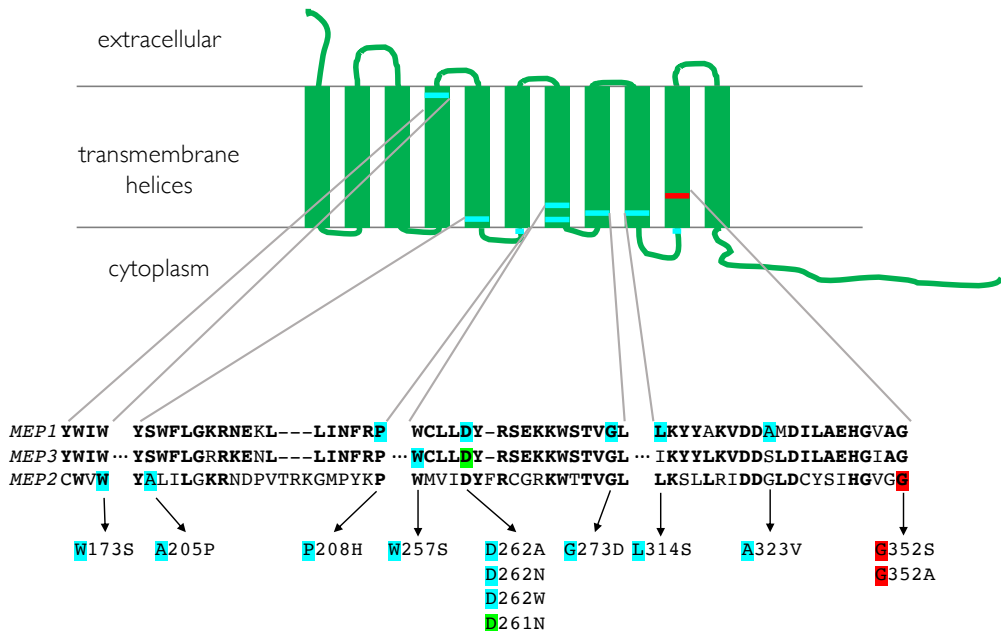

B.

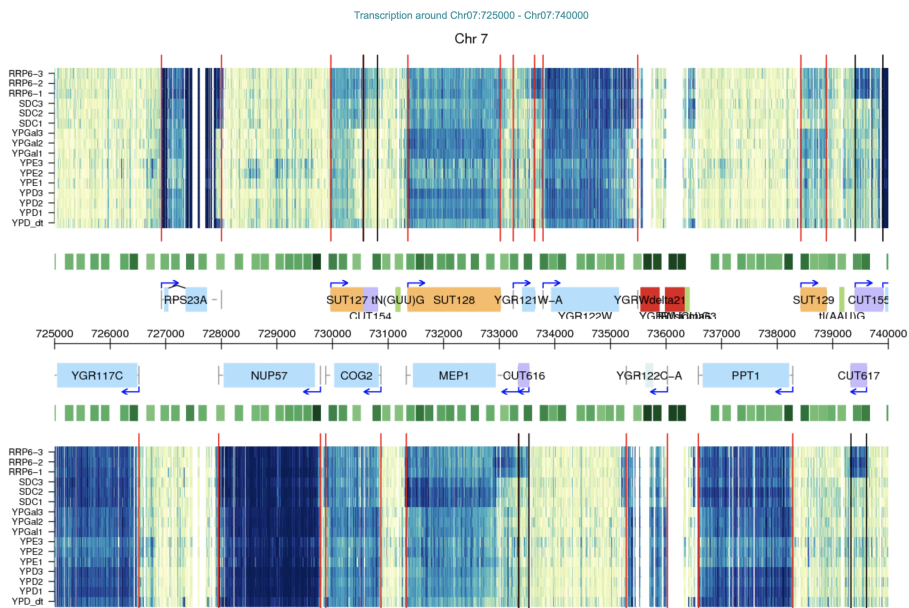

Supplement: pgen.1010747.s003.pdf [file pgen.1010747.s003.pdf]
